# Supplementary material for: Carotid Atherosclerosis and Cerebral Microbleeds: The Framingham Heart Study
Source: PubMed Central journal article supplement — J Am Heart Assoc. 2016 Mar 18;5(3):e002377. doi: 10.1161/JAHA.115.002377 (PMC4943235; doi:10.1161/jaha.115.002377), 2016-03-18
Supplement: JAH3-5-e002377-s001.pdf [file JAH3-5-e002377-s001.pdf]

## **SUPPLEMENTAL MATERIAL**

Supplementary Table 1. Association between IMT progression and CMB, stratified by medication use and total cholesterol level.

| Exposure                              | Stratification Variable (measured at exam 6)   | CMB Location     |         |                         |                  |         |                         |                         |         |                         |
|---------------------------------------|------------------------------------------------|------------------|---------|-------------------------|------------------|---------|-------------------------|-------------------------|---------|-------------------------|
|                                       |                                                | Any CMB (n=101)  |         |                         | Lobar CMB (n=67) |         |                         | Deep + Mixed CMB (n=34) |         |                         |
|                                       |                                                | OR (95% CI)      | P-value | P-value for interaction | OR (95% CI)      | P-value | P-value for interaction | OR (95% CI)             | P-value | P-value for interaction |
| Change in CCA IMT (per SD* increment) | Antihypertensive treatment                     |                  |         |                         |                  |         |                         |                         |         |                         |
|                                       | No                                             | 0.78 (0.53-1.15) | 0.22    |                         | 0.93 (0.62-1.39) | 0.72    |                         | 0.54 (0.27-1.09)        | 0.08    |                         |
|                                       | Yes                                            | 0.89 (0.62-1.29) | 0.55    | 0.68                    | 1.04 (0.81-1.32) | 0.78    | 0.68                    | 0.38 (0.17-0.87)        | 0.02    | 0.53                    |
|                                       | Statin use                                     |                  |         |                         |                  |         |                         |                         |         |                         |
|                                       | No                                             | 0.98 (0.78-1.23) | 0.88    |                         | 1.06 (0.88-1.28) | 0.54    |                         | 0.60 (0.31-1.14)        | 0.12    |                         |
|                                       | Yes                                            | 0.43 (0.20-0.92) | 0.03    | 0.06                    | 0.77 (0.35-1.68) | 0.51    | 0.45                    | 0.24 (0.08-0.73)        | 0.01    | 0.27                    |
|                                       | Antithrombotic therapy use                     |                  |         |                         |                  |         |                         |                         |         |                         |
|                                       | No                                             | 0.87 (0.63-1.20) | 0.39    |                         | 1.05 (0.77-1.44) | 0.75    |                         | 0.43 (0.21-0.91)        | 0.03    |                         |
|                                       | Yes                                            | 0.89 (0.57-1.39) | 0.61    | 0.82                    | 1.04 (0.79-1.36) | 0.79    | 0.99                    | 0.46 (0.21-1.03)        | 0.06    | 0.84                    |
|                                       | Total cholesterol ≥10 <sup>th</sup> percentile |                  |         |                         |                  |         |                         |                         |         |                         |
| No                                    | 1.06 (0.55-2.04)                               | 0.87             |         | 1.28 (0.61-2.69)        | 0.51             |         | **                      | **                      |         |                         |
| Yes                                   | 0.86 (0.64-1.14)                               | 0.29             | 0.67    | 1.03 (0.83-1.27)        | 0.81             | 0.93    | 0.40 (0.23-0.72)        | 0.002                   | 0.20    |                         |
| Change in ICA IMT (per SD* increment) | Antihypertensive treatment                     |                  |         |                         |                  |         |                         |                         |         |                         |
|                                       | No                                             | 1.04 (0.81-1.34) | 0.74    |                         | 1.03 (0.76-1.38) | 0.87    |                         | 1.06 (0.70-1.61)        | 0.80    |                         |
|                                       | Yes                                            | 1.28 (0.91-1.80) | 0.16    | 0.37                    | 1.22 (0.80-1.87) | 0.35    | 0.51                    | 1.37 (0.83-2.27)        | 0.22    | 0.47                    |
|                                       | Statin use                                     |                  |         |                         |                  |         |                         |                         |         |                         |
|                                       | No                                             | 1.10 (0.88-1.38) | 0.41    |                         | 1.14 (0.87-1.48) | 0.34    |                         | 1.01 (0.68-1.50)        | 0.97    |                         |
|                                       | Yes                                            | 1.22 (0.77-1.92) | 0.39    | 0.58                    | 0.98 (0.65-1.49) | 0.93    | 0.65                    | 1.99 (0.95-4.16)        | 0.07    | 0.09                    |
|                                       | Antithrombotic therapy use                     |                  |         |                         |                  |         |                         |                         |         |                         |
|                                       | No                                             | 1.14 (0.87-1.48) | 0.34    |                         | 1.11 (0.80-1.53) | 0.52    |                         | 1.22 (0.77-1.91)        | 0.40    |                         |
|                                       | Yes                                            | 1.12 (0.82-1.52) | 0.47    | 0.98                    | 1.08 (0.75-1.55) | 0.68    | 0.96                    | 1.15 (0.73-1.80)        | 0.55    | 0.78                    |
|                                       | Total cholesterol ≥10 <sup>th</sup> percentile |                  |         |                         |                  |         |                         |                         |         |                         |
| No                                    | 1.28 (0.62-2.65)                               | 0.51             |         | 1.30 (0.53-3.17)        | 0.56             |         | **                      | **                      |         |                         |
| Yes                                   | 1.13 (0.92-1.39)                               | 0.26             | 0.92    | 1.10 (0.86-1.41)        | 0.44             | 0.86    | 1.17 (0.84-1.62)        | 0.36                    | 0.71    |                         |

All models are adjusted for age, sex, and years between exam 8 and MRI.

\*A 1 standard deviation (SD) increment is 0.010 for CCA IMT and 0.087 for ICA IMT.

\*\*Insufficient sample size to calculate stratum-specific effect estimates.—

ICA= internal carotid artery, CCA= common carotid artery, IMT= intima media thickness, CMB= cerebral microbleeds, OR= odds ratio, CI= confidence interval.

**Supplementary table 2. Clinical characteristics among participants with carotid IMT progression by hypertension treatment (N=1238)**

|                                            | No antihypertensive treatment<br>(N=976) | Antihypertensive treatment<br>(N=262) | p-value |
|--------------------------------------------|------------------------------------------|---------------------------------------|---------|
| <i>Clinical Characteristics</i>            |                                          |                                       |         |
| Women, n (%)                               | 546 (55.9)                               | 114 (43.5)                            | 0.0003  |
| Age at Exam 6, yrs, mean [SD]              | 55.6 (8.6)                               | 61.3 (8.0)                            | <0.0001 |
| Age at Exam 8, yrs mean [SD]               | 65.1 (8.6)                               | 70.6 (8.0)                            | <0.0001 |
| Age at MRI testing, yrs, mean [SD]         | 65.7 (8.5)                               | 71.2 (7.9)                            | <0.0001 |
| <i>Exam 6 Covariates</i>                   |                                          |                                       |         |
| Systolic blood pressure, mm Hg, mean [SD]  | 122 (17)                                 | 136 (18)                              | <0.0001 |
| Diastolic blood pressure, mm Hg, mean [SD] | 74 (9)                                   | 79 (10)                               | <0.0001 |
| Pulse Pressure (SBP-DBP), mean [SD]        | 48 (13)                                  | 58 (16)                               | <0.0001 |
| Diabetes mellitus, n (%)                   | 42 (4.3)                                 | 50 (19.3)                             | <0.0001 |
| Current smokers, n (%)                     | 137 (14.0)                               | 23 (8.8)                              | 0.02    |
| Prevalent cardiovascular disease, n (%)    | 30 (3.1)                                 | 46 (17.6)                             | <0.0001 |
| Total cholesterol level, mg/dL, mean [SD]  | 205 (37)                                 | 199 (34)                              | 0.02    |
| Lipid lowering therapy use, n (%)          | 62 (6.4)                                 | 69 (26.4)                             | <0.0001 |
| Statin use, n (%)                          | 51 (5.2)                                 | 56 (21.5)                             | <0.0001 |
| Antithrombotic use, n (%)                  | 205 (21.0)                               | 121 (46.2)                            | <0.0001 |
| APOE ε4 (any)                              | 200 (20.7)                               | 63 (24.5)                             | 0.19    |

Note: 5 participants are missing information on hypertension treatment.

SBP= Systolic Blood Pressure, DBP= Diastolic Blood Pressure, IMT= intima media thickness, SD= standard deviation.

Supplementary Table 3. Association between CCA IMT progression and CMB, stratified by vascular risk factors.

| Exposure                              | Stratification Variable (measured at exam 6) | CMB Location     |         |                         |                  |         |                         |                         |         |                         |
|---------------------------------------|----------------------------------------------|------------------|---------|-------------------------|------------------|---------|-------------------------|-------------------------|---------|-------------------------|
|                                       |                                              | Any CMB (n=101)  |         |                         | Lobar CMB (n=67) |         |                         | Deep + Mixed CMB (n=34) |         |                         |
|                                       |                                              | OR (95% CI)      | P-value | P-value for interaction | OR (95% CI)      | P-value | P-value for interaction | OR (95% CI)             | P-value | P-value for interaction |
| Change in CCA IMT (per SD* increment) | <b>Diabetes</b>                              |                  |         |                         |                  |         |                         |                         |         |                         |
|                                       | No                                           | 0.93 (0.71-1.21) | 0.58    |                         | 1.03 (0.83-1.28) | 0.79    |                         | 0.57 (0.31-1.06)        | 0.08    |                         |
|                                       | Yes                                          | 0.73 (0.39-1.36) | 0.32    | 0.33                    | 1.08 (0.55-2.09) | 0.83    | 0.97                    | 0.34 (0.12-0.99)        | 0.047   | 0.36                    |
|                                       | <b>Smoking</b>                               |                  |         |                         |                  |         |                         |                         |         |                         |
|                                       | No                                           | 0.96 (0.73-1.26) | 0.75    |                         | 1.14 (0.88-1.49) | 0.32    |                         | 0.48 (0.27-0.86)        | 0.01    |                         |
|                                       | Yes                                          | 0.34 (0.09-1.20) | 0.09    | 0.16                    | 0.53 (0.15-1.86) | 0.32    | 0.47                    | 0.17 (0.02-1.54)        | 0.11    | 0.24                    |
|                                       | <b>Hypertension</b>                          |                  |         |                         |                  |         |                         |                         |         |                         |
|                                       | No                                           | 0.89 (0.58-1.37) | 0.60    |                         | 1.05 (0.66-1.66) | 0.84    |                         | 0.57 (0.23-1.38)        | 0.21    |                         |
|                                       | Yes                                          | 0.78 (0.52-1.16) | 0.21    | 0.68                    | 0.98 (0.72-1.33) | 0.90    | 0.95                    | 0.38 (0.19-0.79)        | 0.01    | 0.49                    |
|                                       | <b>Blood pressure ≥140/90 mm Hg</b>          |                  |         |                         |                  |         |                         |                         |         |                         |
|                                       | No                                           | 0.81 (0.57-1.15) | 0.24    |                         | 1.09 (0.77-1.55) | 0.62    |                         | 0.34 (0.17-0.67)        | 0.002   |                         |
|                                       | Yes                                          | 0.94 (0.66-1.34) | 0.74    | 0.59                    | 1.01 (0.75-1.36) | 0.97    | 0.79                    | 0.66 (0.25-1.69)        | 0.38    | 0.40                    |
|                                       | <b>Age ≥65 years</b>                         |                  |         |                         |                  |         |                         |                         |         |                         |
|                                       | No                                           | 0.82 (0.54-1.24) | 0.33    |                         | 1.00 (0.74-1.33) | 0.97    |                         | 0.37 (0.17-0.80)        | 0.01    |                         |
|                                       | Yes                                          | 0.90 (0.64-1.28) | 0.57    | 0.94                    | 1.10 (0.77-1.56) | 0.61    | 0.86                    | 0.48 (0.22-1.01)        | 0.05    | 0.53                    |
|                                       | <b>Male sex</b>                              |                  |         |                         |                  |         |                         |                         |         |                         |
| No                                    | 0.75 (0.47-1.18)                             | 0.21             |         | 1.09 (0.69-1.71)        | 0.71             |         | 0.31 (0.14-0.66)        | 0.002                   |         |                         |
| Yes                                   | 0.93 (0.70-1.25)                             | 0.63             | 0.46    | 1.01 (0.78-1.30)        | 0.95             | 0.69    | 0.63 (0.31-1.30)        | 0.21                    | 0.17    |                         |

All models are adjusted for age, sex, and years between exam 8 and MRI.

\*A 1 standard deviation (SD) increment is 0.010 for CCA IMT.

CCA= common carotid artery, IMT= intima media thickness, CMB= cerebral microbleeds, OR= odds ratio, CI= confidence interval.

**Supplementary Table 4. Association between CCA IMT\* progression and CMB, stratified by antihypertensive medication use and blood pressure level.**

| Anti-hypertensive treatment** | Blood pressure level (mm Hg)** | N   | CMB Location            |             |                            |                         |             |                            |                         |             |                            |
|-------------------------------|--------------------------------|-----|-------------------------|-------------|----------------------------|-------------------------|-------------|----------------------------|-------------------------|-------------|----------------------------|
|                               |                                |     | Any CMB (n=101)         |             |                            | Lobar CMB (n=67)        |             |                            | Deep + Mixed CMB (n=34) |             |                            |
|                               |                                |     | OR (95% CI)             | P-value     | P-value for interaction*** | OR (95% CI)             | P-value     | P-value for interaction*** | OR (95% CI)             | P-value     | P-value for interaction*** |
| No                            | <140/90                        | 821 | <b>0.89 (0.58-1.37)</b> | <b>0.60</b> |                            | <b>1.05 (0.66-1.66)</b> | <b>0.84</b> |                            | <b>0.57 (0.23-1.38)</b> | <b>0.21</b> |                            |
|                               | ≥140/90                        | 143 | 0.27 (0.07-1.02)        | 0.05        |                            | †                       | †           |                            | 0.41 (0.08-2.01)        | 0.27        |                            |
| Yes                           | <140/90                        | 150 | 0.48 (0.23-0.99)        | 0.046       |                            | 0.94 (0.42-2.09)        | 0.87        |                            | 0.17 (0.06-0.54)        | 0.003       |                            |
|                               | ≥140/90                        | 112 | 1.05 (0.82-1.34)        | 0.70        | 0.09                       | 1.06 (0.83-1.35)        | 0.66        | 0.73                       | 0.98 (0.31-3.09)        | 0.97        | 0.10                       |

All models are adjusted for age, sex, and years between exam 8 and MRI.

\*A 1 standard deviation (SD) increment is 0.010 for CCA IMT.

\*\*Measured at exam 6 (baseline).

\*\*\*Likelihood ratio test (df=4) for the three-way interaction between antihypertensive treatment, blood pressure category, and change in CCA IMT.

† Insufficient sample size to calculate stratum specific estimates.

CCA= common carotid artery, IMT= intima media thickness, CMB= cerebral microbleeds, OR= odds ratio, CI= confidence interval.

**Supplementary Table 5. Association between CCA IMT progression and CMB, stratified by antihypertensive medication type.**

| Exposure                                     | Anti-hypertensive treatment type** | N   | CMB Location     |         |                  |         |                  |         |
|----------------------------------------------|------------------------------------|-----|------------------|---------|------------------|---------|------------------|---------|
|                                              |                                    |     | Any CMB          |         | Lobar CMB        |         | Deep + Mixed CMB |         |
|                                              |                                    |     | OR (95% CI)      | P-value | OR (95% CI)      | P-value | OR (95% CI)      | P-value |
| <b>Change in CCA IMT (per SD* increment)</b> | Diuretic                           | 60  | 1.30 (0.86-1.97) | 0.22    | 1.61 (0.97-2.67) | 0.07    | 0.93 (0.41-2.12) | 0.86    |
|                                              | Calcium channel blocker            | 75  | 0.82 (0.35-1.92) | 0.65    | 0.61 (0.17-2.22) | 0.45    | 1.61 (0.50-5.18) | 0.43    |
|                                              | ACE inhibitor or ARB               | 115 | 0.96 (0.59-1.58) | 0.88    | 1.44 (0.91-2.30) | 0.12    | 0.12 (0.03-0.56) | 0.007   |
|                                              | Beta blocker                       | 81  | 1.05 (0.49-2.25) | 0.91    | 1.00 (0.31-3.24) | 0.99    | 1.10 (0.42-2.84) | 0.85    |

All models are adjusted for age, sex, and years between exam 8 and MRI.

\*A 1 standard deviation (SD) increment is 0.010 for CCA IMT.

\*\*Measured at exam 6 (baseline).

CCA= common carotid artery, IMT= intima media thickness, CMB= cerebral microbleeds, ACE= angiotensin converting enzyme, ARB= angiotensin receptor blocker, OR= odds ratio, CI= confidence interval.
